# Supplementary material for: Adaptive liquid flow behavior in 3D nanopores
Source: Royal Society of Chemistry journal article supplement (doi:10.1039/c7cp02981k), 2017-01-01
Supplement: c7cp02981k1.pdf [file c7cp02981k1.pdf]

## Adaptive Liquid Flow Behavior in 3D Nanopores -- ESI

Mingzhe Li and Weiyi Lu\*

Department of Civil and Environmental Engineering, Michigan State University, East Lansing,  
Michigan 48824, USA

\*wylu@egr.msu.edu

### Dynamic Behavior of LN

Fig. S1 shows the acceleration histories of the LN under dynamic impact. The complete loading curves the LN under dynamic tests are shown in Fig. S2. No plastic stress plateau above 15 MPa was observed suggesting no permanent damage in the LN. According to our previous work,<sup>1</sup> the nanoporous particles are able to sustain compressive load of hundreds of MPa without collapsing.

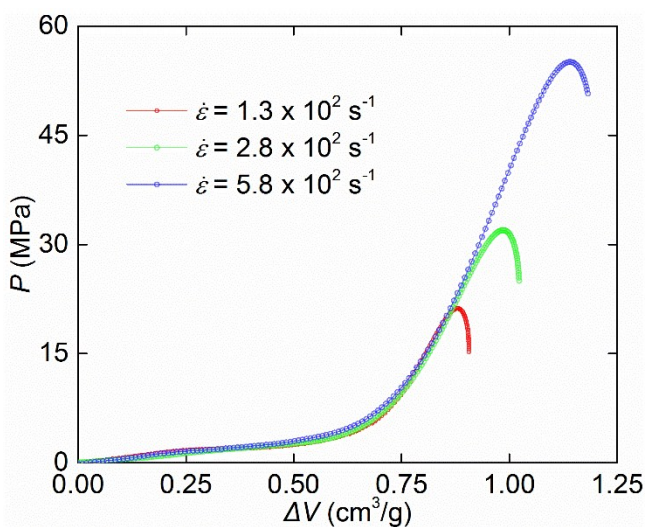

Fig. S1 Overall loading curves of LN under dynamic tests.

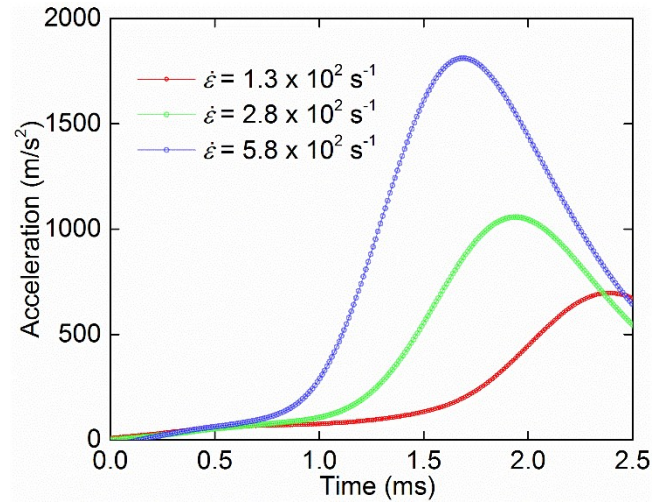

Fig. S2 Acceleration history of LN under dynamic tests.

## References

- 1 A. Han, V. K. Punyamurthula, W. Lu and Y. Qiao, *J. Appl. Phys.*, 2008, **103**, 84318.
